# Supplementary material for: Sexual health promotion messages for young people in Netflix most-watched series content (2015–2020): mixed-methods analysis study
Source: HighWire-hosted journal article supplement (doi:10.1136/bmjopen-2021-052826), 2021-12-01
Supplement: bmjopen-2021-052826supp001_data_supplement.pdf [file bmjopen-2021-052826supp001_data_supplement.pdf]

**Multimedia appendix 1: Sexual health themes definitions and other youth health themes list**

| <b>Sexual health themes</b>                                | <b>Definition : depiction or discussion of...</b>                                                                                                                      |
|------------------------------------------------------------|------------------------------------------------------------------------------------------------------------------------------------------------------------------------|
| <b>Romantic relationships</b>                              | All kind of relationships with feelings or sexual attraction: sexfriends, couple, crush, infidelity, etc.                                                              |
| <b>Sexual orientation / gender identity</b>                | The LGBTQ + community.<br>Physical / sexual / emotional attraction to the same sex, the opposite sex, or both.<br>Gender expression and identity.                      |
| <b>Sexual violence and harassment</b>                      | Sexual violence and sexual harassment, potential or proven, including attempts. Takes into account the notion of consent and slut-shaming.                             |
| <b>Discrimination / homophobia / sexism / grossophobia</b> | Unjust or prejudicial treatment of different categories of people, on the grounds of sexual orientation, sex, gender, gender expression, skin color, body, disability. |
| <b>Planned or unplanned pregnancies</b>                    | Planned or unplanned pregnancy, whether risky / proven / kept or not.                                                                                                  |
| <b>Pleasure, masturbation</b>                              | Sexual pleasure, alone or with others.                                                                                                                                 |
| <b>STI protection</b>                                      | Any method to prevent an STI, whether scientifically proven or not, and whether it is connected to a sexual act or not.                                                |
| <b>STI</b>                                                 | STIs, from their prevention to their long-term consequences, including treatments and transmission.                                                                    |
| <b>Contraception</b>                                       | Any method aimed at preventing pregnancy, whether scientifically proven or not, and whether it is connected to a sexual act or not.                                    |
| <b>Sexual disorders</b>                                    | Difficulty experienced by one or more individuals during a certain stage of sexual activity, involving desire, arousal or orgasm.                                      |
| <b>Self-acceptance / self-esteem</b>                       | Self and body image, self-esteem.                                                                                                                                      |
| <b>Reproductive health / biology</b>                       | Menstrual cycle, conception, anatomy.                                                                                                                                  |
| <b>Puberty</b>                                             | Physical and emotional changes related to puberty. First menstruation, first ejaculation, nocturnal ejaculation and spontaneous erections.                             |
| <b>Abortion</b>                                            | The termination of pregnancy, voluntary or medical, and its conditions, methods, physical and emotional consequences, implications.                                    |
| <b>Adolescent / young parenthood</b>                       | Parenting among adolescents and young adults.                                                                                                                          |
| <b>Other (free text field)</b>                             | Sexual therapy, gay/lesbian parenting, 1st intercourse, pornography, virginity, feminism, sexual games, fantasies...                                                   |

| <b>Other youth health themes</b> |
|----------------------------------|
| Alcohol                          |
| Drugs                            |
| Parent-adolescent relationship   |
| School harassment                |
| Disease, disability              |
| Tobacco                          |
| Depression, suicide              |
| Social networks, digital         |

|                                                                                                              |
|--------------------------------------------------------------------------------------------------------------|
| Popularity, rumors                                                                                           |
| Addiction                                                                                                    |
| Abuse                                                                                                        |
| Road safety                                                                                                  |
| Peer pressure                                                                                                |
| Eating disorders                                                                                             |
| Other :<br>Friendship, religion, violence, school<br>problems, theft, racism, being<br>adopted, firearms ... |
