# Supplementary material for: Sexual health promotion messages for young people in Netflix most-watched series content (2015–2020): mixed-methods analysis study
Source: HighWire-hosted journal article supplement (doi:10.1136/bmjopen-2021-052826), 2021-12-01

**Multimedia appendix 3: Flow chart of the selection of the series included in the study**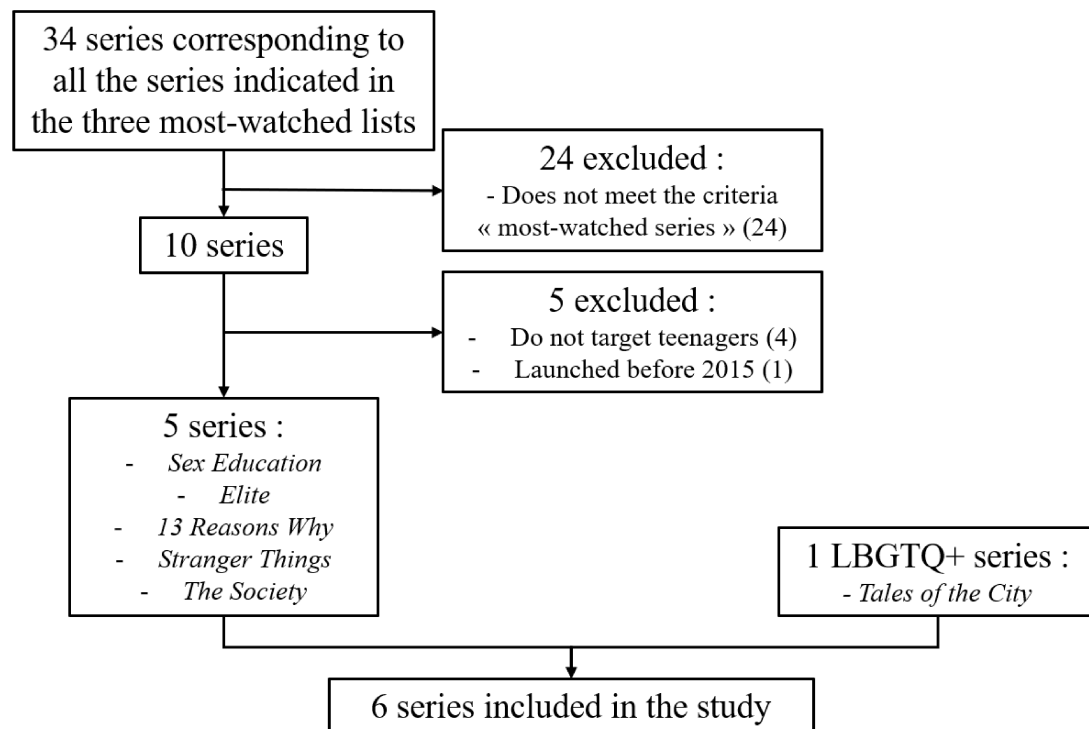

Supplement: bmjopen-2021-052826supp003_data_supplement.pdf [file bmjopen-2021-052826supp003_data_supplement.pdf]
