# Supplementary material for: Sexual health promotion messages for young people in Netflix most-watched series content (2015–2020): mixed-methods analysis study
Source: HighWire-hosted journal article supplement (doi:10.1136/bmjopen-2021-052826), 2021-12-01
Supplement: bmjopen-2021-052826supp004_data_supplement.pdf [file bmjopen-2021-052826supp004_data_supplement.pdf]

In Sex Education, almost each episode raises a sexual health issue, which is discussed along the entire episode, from the description of the problem to its resolution, even when the associated promotion message is delivered during only one scene. Most of the time, the sexual health topic is presented from the first scene of the episode, which is not the case in other series. Some series stage main characters for scenes including sexual health promotion messages, whereas Sex Education involves secondary characters who appear to highlight an issue.

| Series' title         | Season | Episode | Onset time | Sexual health promotion message                                                                                                                                                 | Theme                                             | Visual depiction                                                                                                                                                                                                                                                                                                                                                                                                                                                                                 |
|-----------------------|--------|---------|------------|---------------------------------------------------------------------------------------------------------------------------------------------------------------------------------|---------------------------------------------------|--------------------------------------------------------------------------------------------------------------------------------------------------------------------------------------------------------------------------------------------------------------------------------------------------------------------------------------------------------------------------------------------------------------------------------------------------------------------------------------------------|
| <b>13 Reasons Why</b> | 1      | 4       | 21:20      | <b>Taking pictures of a person (naked and kissing someone) without their knowledge is forbidden and punishable by law</b>                                                       | Other: stalker                                    | Tyler took pictures of Hannah kissing another girl in her room, through her window, without the girls knowing. Clay, very upset, comes to talk to him at school and threatens to report him if he doesn't delete all the photos and their negatives right away. He explains that this is a crime punishable by law.                                                                                                                                                                              |
| <b>13 Reasons Why</b> | 1      | 7       | 36:50      | <b>Commenting on someone's appearance can be a form of sexual harassment</b>                                                                                                    | Sexual violence and harassment: sexual harassment | In communication class, the female teacher reads anonymous papers left by students. One of the papers contains a "positive" remark about her body. She explains that it is not appropriate to objectify a person's body.                                                                                                                                                                                                                                                                         |
| <b>Elite</b>          | 1      | 3       | 19:00      | <b>Anyone can be infected with HIV, regardless of social class</b>                                                                                                              | STI: HIV                                          | At a party, Marina (16 years old, HIV positive) is drunk, and her brother sees her dancing without a T-shirt. He takes her aside to talk to her and lecture her. The brother says that she got HIV because she slept with the wrong person and that she has not learned from her mistakes since she continues to date "that kind of person". Marina tells him that HIV is not a disease of the poor and that the virus does not care about the size of your house, your money or your last name. |
| <b>Elite</b>          | 1      | 3       | 49:20      | <b>A person with HIV who is on treatment and has an undetectable viral load cannot transmit the virus (health promotion message is cited 2 times for 2 different scenarios)</b> | STI : HIV                                         | Nano found out that Marina was infected with HIV. He had slept with her, so he is going to talk to her. She explains to him that her viral load is undetectable, so she cannot have infected him.                                                                                                                                                                                                                                                                                                |
| <b>Elite</b>          | 1      | 5       | 37:00      | <b>Staging the use of the condom with emphasis on the difficulty of putting it on</b>                                                                                           | STI protection + contraception                    | Marina and Samuel are getting ready to have sex, he takes out a condom, opens it and tries to put it on, but he can't do it. She reassures him.                                                                                                                                                                                                                                                                                                                                                  |
| <b>Elite</b>          | 1      | 5       | 15:20      | <b>A person with HIV who is on treatment and has an undetectable viral load cannot transmit the virus. Explanation of HIV treatment and monitoring modalities</b>               | STI: HIV                                          | In class, the teacher takes Samuel's phone, which he used during class, and forces a classmate to read Samuel's message. It said : "Marina doesn't have AIDS, you idiot, it's HIV". Since the class didn't know about it, Marina stood up and spoke to explain her situation. She explains that they don't have to worry because she is taking her treatment and testing every 4 months. Her viral load is undetectable so she cannot infect them.                                               |
| <b>Elite</b>          | 1      | 6       | 28:50      | <b>When the viral load is undetectable, there is less than a 1% chance that the mother-to-be will transmit the virus to the baby</b>                                            | STI: HIV                                          | Nano and Marina (16 years old, HIV positive) are in the car, coming out of the clinic where Marina was supposed to have an abortion. They decided to keep the baby but Nano is worried so Marina reassures him and explains that she has less than one percent risk of transmitting the virus to the baby.                                                                                                                                                                                       |

|                   |   |   |               |                                                                                                                                                                                                                              |                                                          |                                                                                                                                                                                                                                                                                                                                                                                                                                                                                                                          |
|-------------------|---|---|---------------|------------------------------------------------------------------------------------------------------------------------------------------------------------------------------------------------------------------------------|----------------------------------------------------------|--------------------------------------------------------------------------------------------------------------------------------------------------------------------------------------------------------------------------------------------------------------------------------------------------------------------------------------------------------------------------------------------------------------------------------------------------------------------------------------------------------------------------|
| Tales of the City | 1 | 2 | 52:30         | Staging the use of a condom during sexual intercourse                                                                                                                                                                        | STI protection                                           | Two condoms are placed on a mattress, one is open. The camera zooms out on a gay couple having sex.                                                                                                                                                                                                                                                                                                                                                                                                                      |
| Tales of the City | 1 | 2 | 04:45 / 16:10 | Highlighting gender discrimination with regard to career plans: being a careerist does not depend on one's gender and family plans do not depend on one's gender (a woman also has the right to be professionally ambitious) | Discrimination                                           | Scene 1: At the restaurant, Mary Ann and two friends are having brunch together and talk about Mary Ann who abandoned her family and moved to another city for her career. She says she knows that people judge her, although men often do the same thing without anyone being shocked. MaryAnn is at an old friend's house drinking wine while discussing the situation. Her friend reassures her about her career choices and tells her that no matter what her choices are, there will always be people to criticize. |
| Tales of the City | 1 | 3 | 12:50         | Having an undetectable viral load and being on pre-exposure prophylaxis makes the risk of HIV infection very low: it is possible to stop using a condom                                                                      | STI: HIV + STI protection                                | Michael sits at a doctor's desk and looks at a pre-exposure prophylaxis leaflet while she explains to him that his viral load is still undetectable and everything is fine. They then talk about stopping condom use with his boyfriend who has been on pre-exposure prophylaxis for several weeks. The doctor explains that with this prophylaxis and Michael's undetectable viral load, there is no risk of transmitting HIV to his partner, but that it depends on whether Michael feels ready to stop or not.        |
| Tales of the City | 1 | 3 | 46:02         | One must be able to consent to the cessation of condom use (if Prep and viral load undetectable) through communication with one's partner                                                                                    | Sexual violence and harassment: consent + STI protection | Michael is sitting on the bed, a condom in his hand, pensive. He puts it in the drawer and lies down, Ben joins him in his underwear, they kiss and get ready to have sex but Michael stops him and asks him for a minute. Ben seems to understand the problem, he pulls a condom out of the drawer and reassures him that he doesn't have to rush and that they can continue to use a condom until Michael feels ready to stop.                                                                                         |
| Tales of the City | 1 | 4 | 29:40         | Using the term "tranny" can be offensive                                                                                                                                                                                     | Discrimination: transphobia                              | At a gay men's dinner party, Ben is the youngest (28 years old) and the only one to be shocked when a guest uses the term "tranny". He explains that people should be called what they want to be called, for the sake of dignity and visibility. He says that using the term "tranny" as an insult is offensive. An older man gets angry and reminds him that the reason gay men have visibility and more rights today is because his generation fought for it, so they can use the words they want.                    |
| Tales of the City | 1 | 4 | 36:35         | Staging of a naked woman in a public place (bar) explaining her choice to show her body: it is about taking control and making your own choices (highlighting two different conceptions of feminism)                         | Other: feminism                                          | A dancer does her show in a queer bar and ends up topless. Mary Ann is at the bar and after the show she chats with the dancer. Mary Ann does not understand how this is part of the feminist movement and explains that in her day feminism sought to free women from objectification, not to encourage it. The dancer explains that she does not feel objectified, that she takes control of her body and makes her own choices.                                                                                       |

|                          |   |    |                      |                                                                                                                                         |                                                           |                                                                                                                                                                                                                                                                                                                                                                                                                                                                                                                                                                  |
|--------------------------|---|----|----------------------|-----------------------------------------------------------------------------------------------------------------------------------------|-----------------------------------------------------------|------------------------------------------------------------------------------------------------------------------------------------------------------------------------------------------------------------------------------------------------------------------------------------------------------------------------------------------------------------------------------------------------------------------------------------------------------------------------------------------------------------------------------------------------------------------|
| <b>Tales of the City</b> | 1 | 7  | 18:25                | <b>The question of "maternal feeling" is deconstructed since the "feeling of being a parent" does not differ according to gender</b>    | Discrimination: sexism                                    | Shawna learned that she was adopted and that her birth mother had passed away. She goes to her birth mother's brother's house. The uncle, his wife and Shawna are talking in the garden and Shawna reassures her uncle that she doesn't blame him for not taking care of her, because if she were asked to take care of a baby today she wouldn't want to. The wife replies that she doesn't think she would say no because women are more maternal. Shawna explains that she doesn't agree and that it's not a gender issue and it depends on everyone's plans. |
| <b>Tales of the City</b> | 1 | 10 | 06:15                | <b>Using the term "pussies" to imply weakness is denigrated to women</b>                                                                | Discrimination: sexism                                    | The city's queer community gathered on the site of a house to protest its demolition. The woman who requested the demolition was angry at the female foreman who refused to start the demolition with so many people on the site. She insults her as a "pussy" and a drag queen intervenes to tell her that it is demeaning to women to use this word as an insult.                                                                                                                                                                                              |
| <b>Sex Education</b>     | 1 | 1  | 00:30<br>//<br>33:00 | <b>Visual information on how to put on a condom</b>                                                                                     | STI protection + contraception                            | Scene 1: Adam and Aimee are sleeping together. When Adam finishes, Adam removes the condom and Aimee asks to see it. She grabs it and holds it with her fingertips.<br><br>Scene 2: In sexuality education class, students in pairs are asked to put a condom on a fake penis. Otis opens the package, "pushes" the reservoir to the right side and places the condom on the top of the penis, he tries to unroll it with his fingertips but is unable to do so, Maeva takes over, pinches the reservoir while unrolling the condom (no dialogue).               |
| <b>Sex Education</b>     | 1 | 1  | 03:50                | <b>The age difference between two adults regarding sexual and romantic relationships is not a problem and should not be stigmatized</b> | Romantic relationships: age difference in a relationship  | Otis, his mother Jean and his partner (younger than her) are at the table. Otis makes fun of the partner by asking his age and whether he has an Oedipal complex. Jean replies that it is perfectly normal to be attracted to an older woman and that by stigmatizing his choices, Otis is maintaining an unhealthy discourse on middle-aged manhood.                                                                                                                                                                                                            |
| <b>Sex Education</b>     | 1 | 1  | 24:00                | <b>Cannabis use increases impotence and decreases the ability to ejaculate</b>                                                          | Other: effect of cannabis on sexuality + sexual disorders | Otis, his mother Jean (sexologist) and Adam on the terrace. Adam and Jean smoke cannabis while discussing. Jean asks Adam if he smokes every day and then explains that new studies show a link between cannabis and impotence. She adds that she has many clients who were heavy cannabis users when they were younger and now have "trouble finishing".                                                                                                                                                                                                        |
| <b>Sex Education</b>     | 1 | 1  | 31:05                | <b>Ringardisation of homophobia + defence of a victim</b>                                                                               | Discrimination: homophobia                                | In the school hallway, Otis and Eric (openly gay) are talking. Adam arrives, pushes and slams Eric against the lockers, grabbing his jaw. Another student intervenes and tells Adam that homophobia has been outdated for years. Adam lets go of Eric and leaves without saying anything.                                                                                                                                                                                                                                                                        |

|               |   |   |                                       |                                                                                                                                                                         |                                                                       |                                                                                                                                                                                                                                                                                                                                                                                                                                                                                                                                                                                                                                                                                                                                                                                                                                                                                                                                                                                                                                                                                                                                                                                                                                                                                                                                                                                                                                                                                                                                                                               |
|---------------|---|---|---------------------------------------|-------------------------------------------------------------------------------------------------------------------------------------------------------------------------|-----------------------------------------------------------------------|-------------------------------------------------------------------------------------------------------------------------------------------------------------------------------------------------------------------------------------------------------------------------------------------------------------------------------------------------------------------------------------------------------------------------------------------------------------------------------------------------------------------------------------------------------------------------------------------------------------------------------------------------------------------------------------------------------------------------------------------------------------------------------------------------------------------------------------------------------------------------------------------------------------------------------------------------------------------------------------------------------------------------------------------------------------------------------------------------------------------------------------------------------------------------------------------------------------------------------------------------------------------------------------------------------------------------------------------------------------------------------------------------------------------------------------------------------------------------------------------------------------------------------------------------------------------------------|
| Sex Education | 1 | 1 | 33:10                                 | <b>Schematic and visual information on female anatomy (hymen)</b>                                                                                                       | Reproductive health / biology: female anatomy                         | In sexuality education classes, in pairs, students must complete a figure of the female anatomy (figure filmed in the foreground, legends "clitoris", "hymen" and "paraurethral glands" readable) Maeve completes the figure but is mistaken and Otis corrects her.                                                                                                                                                                                                                                                                                                                                                                                                                                                                                                                                                                                                                                                                                                                                                                                                                                                                                                                                                                                                                                                                                                                                                                                                                                                                                                           |
| Sex Education | 1 | 1 | 35:50                                 | <b>Erectile dysfunction may be due to low self-esteem and taking too much Viagra can lead to an erection that is too strong for too long: need to take it correctly</b> | Sexual disorders, self-acceptance / self-esteem.                      | Maeve and Otis hear a scream coming from the toilet, they enter and fall on Adam, sitting, panicked, with an erection visible through his clothes. He explains that he took 3 Viagra pills for his impotence problems and that his erection doesn't go away. He explains that he ask himself a lot of questions during intercourse, that he is afraid of not being well enough, etc. Otis reassures him and explains that he has performance anxiety and that he must learn to love himself to overcome it.                                                                                                                                                                                                                                                                                                                                                                                                                                                                                                                                                                                                                                                                                                                                                                                                                                                                                                                                                                                                                                                                   |
| Sex Education | 1 | 2 | 20:00                                 | <b>Cranberry juice can help with vaginal yeast infections.</b>                                                                                                          | Other: vaginal yeast infection                                        | A group of young people discuss at a party, sitting in the living room. Otis arrives when a boy says he likes cranberry juice. Otis, wanting to find clients for his sex therapy clinic explains that cranberry juice is good for vaginal yeast infections. No one answers. Otis leaves.                                                                                                                                                                                                                                                                                                                                                                                                                                                                                                                                                                                                                                                                                                                                                                                                                                                                                                                                                                                                                                                                                                                                                                                                                                                                                      |
| Sex Education | 1 | 2 | 00:00 / 22:56 / 25:20 / 31:50 / 44:00 | <b>Active communication within the couple allows for better management of low self-esteem.</b>                                                                          | Self-acceptance / self-esteem + Romantic relationships: communication | 1st scene: a couple of teenagers are kissing on the bed, when the boy (Sam) wants to take the girl's (Kate's) shirt off, she stops him and says "no". He goes to turn off the light and tries to reach her in the dark while she is undressing. They kiss each other and while changing position she kicks him in the testicles with her knees. When he says he is going to turn the light on again she pushes him and the two fall and hurt themselves.<br>Scene 2: At a party, Otis walks into a bathroom where Kate is. She has a bottle of alcohol in her hands and a neck brace. The two are drinking and talking. She explains that she doesn't want Sam to see her naked because she is "disgusting".<br>3rd and 4th scenes: Otis, Sam and Kate in the bathroom. The couple argue, Otis sits in a corner, then stands up and interrupts them saying that their communication is ineffective. He makes them talk back to back, one after the other, and Kate finally confesses her discomfort. Sam reassures her but she doesn't believe him. Otis asks her to name five things that she likes about herself and explains that if she doesn't like herself she can never believe that Sam loves her. The couple eventually reconcile and kiss.<br>Scene 5: At the high school, the students attend the choir performance. Otis gets a paper ball on him. He unfolds it and is written on it "THANK YOU!", he turns his head and Kate and Sam smile at him while putting their thumbs up. Otis smiles and does a thumb up. Kate forms the words "thank you" on her lips. |

|               |   |   |                                     |                                                                                                                                                                                                                 |                                                                            |                                                                                                                                                                                                                                                                                                                                                                                                                                                                                                                                                                                                                                                                                                                                                                                                                                                                                                                                                                                                                                                                                                                                                |
|---------------|---|---|-------------------------------------|-----------------------------------------------------------------------------------------------------------------------------------------------------------------------------------------------------------------|----------------------------------------------------------------------------|------------------------------------------------------------------------------------------------------------------------------------------------------------------------------------------------------------------------------------------------------------------------------------------------------------------------------------------------------------------------------------------------------------------------------------------------------------------------------------------------------------------------------------------------------------------------------------------------------------------------------------------------------------------------------------------------------------------------------------------------------------------------------------------------------------------------------------------------------------------------------------------------------------------------------------------------------------------------------------------------------------------------------------------------------------------------------------------------------------------------------------------------|
| Sex Education | 1 | 3 | 01:10                               | <b>Condoms are not always 100% effective as a means of contraception and there are others means of contraception</b>                                                                                            | Contraception: condom, pill, implant                                       | Maeve is at a doctor's office, sitting with a female health care worker who asks her questions about her unwanted pregnancy. Maeve says she always protects herself with a condom. The professional explains that condoms are not 100% reliable and that there are other contraceptive methods available if she wants to use them.                                                                                                                                                                                                                                                                                                                                                                                                                                                                                                                                                                                                                                                                                                                                                                                                             |
| Sex Education | 1 | 3 | 01:10<br>//<br>28:10<br>//<br>38:57 | <b>Visual and auditory information on how an abortion is performed. After an abortion, you may vomit and bleed a little. If this intensifies (bleeding), you should call the health center</b>                  | Abortion + Planned or unplanned pregnancy                                  | Scene 1: Maeve is at a doctor's appointment, sitting with a woman from the health care staff who asks her questions about her unwanted pregnancy. She explains that someone has to pick her up after the abortion is over, and that she is not allowed to leave alone.<br>Scene 2: Maeve and two other women are sitting side by side in operating clothes, waiting for their abortion, tense. The woman in the middle, more relaxed takes the hands of the other two. They make the wave and laugh. Then Maeve is called, she is lying in a hospital bed with the nurses and doctor around. They put a blood pressure monitor around her arm and an IV in her hand (explanation from the nurse that it will sting a little but that it's to put her to sleep) and when she falls asleep they put a mask on her face.<br>Scene 3: Maeve wakes up from her abortion and a nurse comes to give her food and water. Then Maeve leaves, she's at the clinic reception, Otis is waiting for her in the waiting room. She speaks with the lady at the reception desk who explains the potential side effects and what to do. Maeve leaves with Otis. |
| Sex Education | 1 | 3 | 08:45                               | <b>Peers can create pressure that makes you feel bad about your virginity: don't rush into it</b>                                                                                                               | Self-acceptance : shame of one's virginity                                 | Otis is in a high school room, seeing clients for his sex therapy clinic. An unscheduled client comes in and asks to stay for a few minutes to make others think he is sexually active. Otis says he understands and that peer pressure can be difficult, but that one should not live with regrets.                                                                                                                                                                                                                                                                                                                                                                                                                                                                                                                                                                                                                                                                                                                                                                                                                                           |
| Sex Education | 1 | 4 | 12:20                               | <b>Herpes can be spread through kissing</b>                                                                                                                                                                     | Other: herpes (not sexually transmitted)                                   | A couple kissing on a sofa. Maeve needs to sit down and scares them away by saying, "Get your herpes somewhere else!"                                                                                                                                                                                                                                                                                                                                                                                                                                                                                                                                                                                                                                                                                                                                                                                                                                                                                                                                                                                                                          |
| Sex Education | 1 | 4 | 41:27                               | <b>As far as love relationships are concerned, a problem in a sexual relationship can be due to a relationship problem, since sexual and love attractions are not chosen - Honesty advice with your partner</b> | Romantic relationships                                                     | Ruthie and her girlfriend consult Otis for problems in their sexual relationships. Later, Otis sees Ruthie with another girl (Jessica). In class he asks her if she likes another girl, and Ruthie confirms that with Jessica everything is simple and goes well, but that she feels badly about her girlfriend who was her best friend. Otis explains that you don't choose who you are attracted to and that you can't control a relationship, but that you have to be honest and she has to tell her girlfriend.                                                                                                                                                                                                                                                                                                                                                                                                                                                                                                                                                                                                                            |
| Sex Education | 1 | 5 | 05:40<br>/<br>42:50                 | <b>A "nude" sent over the internet or by message can be reused and disseminated against it (cyberbullying, blackmail) and can remain on the internet forever, with a major and</b>                              | Sexual violence and harassment: pornographic photo distribution, blackmail | An intimate picture of a girl from the high school (Ruby) was sent to all students.<br>Scene 1: Otis and Maeve are walking through the school hallways and discussing the situation. Otis says that Ruby should go to the police because it's a crime.                                                                                                                                                                                                                                                                                                                                                                                                                                                                                                                                                                                                                                                                                                                                                                                                                                                                                         |

|                      |   |   |                               |                                                                                                                                                                                                                                               |                                                                                                         |                                                                                                                                                                                                                                                                                                                                                                                                                                                                                                                                                                                                                                                                                                                                                                                                                                                                                                                                                                                                                                                                                                                        |
|----------------------|---|---|-------------------------------|-----------------------------------------------------------------------------------------------------------------------------------------------------------------------------------------------------------------------------------------------|---------------------------------------------------------------------------------------------------------|------------------------------------------------------------------------------------------------------------------------------------------------------------------------------------------------------------------------------------------------------------------------------------------------------------------------------------------------------------------------------------------------------------------------------------------------------------------------------------------------------------------------------------------------------------------------------------------------------------------------------------------------------------------------------------------------------------------------------------------------------------------------------------------------------------------------------------------------------------------------------------------------------------------------------------------------------------------------------------------------------------------------------------------------------------------------------------------------------------------------|
|                      |   |   |                               | <b>negative impact for a long time. The dissemination of naked photos against the person concerned is condemnable and punishable by law.</b>                                                                                                  |                                                                                                         | Scene 2: The principal speaks in front of all the students at the high school and says that not only is the release of the photo despicable behavior, but it has very serious consequences that could lead to legal action.                                                                                                                                                                                                                                                                                                                                                                                                                                                                                                                                                                                                                                                                                                                                                                                                                                                                                            |
| <b>Sex Education</b> | 1 | 5 | 27:50                         | <b>Bodies are all different and no one should be ashamed (acceptance/image of one's body)</b>                                                                                                                                                 | Self-acceptance: body image                                                                             | Otis Maeve Ruby and a friend are in a room. Ruby is afraid that everyone will find out that the photo they are showing is hers. Otis explains to her that there is no shame to feel, that everyone has a body and that the fact that everyone knows about the photo will only be humiliating if she sees it that way. He tries to show her his big toe that looks like a thumb to reassure her and show her that we all have different bodies.                                                                                                                                                                                                                                                                                                                                                                                                                                                                                                                                                                                                                                                                         |
| <b>Sex Education</b> | 1 | 5 | 20:40                         | <b>Sexual rumors (started out of frustration / revenge) can lead to a bad reputation with a psychological impact</b>                                                                                                                          | Sexual violence and harassment: slutshaming, rumors                                                     | Otis and Maeve talk about Ruby whose intimate picture was sent to the whole school. Otis doesn't understand why Maeve wants to help Ruby when Ruby is mean to her. Maeve tells about the sexual rumors and harassment she has experienced. She explains that these rumors stick to the skin, that it's painful and that no one deserves it, even Ruby.                                                                                                                                                                                                                                                                                                                                                                                                                                                                                                                                                                                                                                                                                                                                                                 |
| <b>Sex Education</b> | 1 | 6 | 11:10 / 29:14                 | <b>Staging the prediction of condom use in scheduled sexual intercourse</b>                                                                                                                                                                   | Contraception + STI protection : condom                                                                 | 1st scene: Otis and Lily in the school hallways. They are planning to have their first sexual intercourse together that night. She asks him to take care of the lube and tells him she is bringing the condoms.<br>Scene 2: In Otis' bedroom, Otis is shirtless and Lily is in her bra. She plays music and starts to dance in a "sexy" way while looking at Otis. She takes one of the condoms out of her purse while looking and smiling at Otis, she keeps dancing while spinning them.                                                                                                                                                                                                                                                                                                                                                                                                                                                                                                                                                                                                                             |
| <b>Sex Education</b> | 1 | 6 | 14:10 / 27:10 / 43:15 / 46:00 | <b>A sexual intercourse is not necessarily the reproduction of a pornographic film scene and you have to be able to think about your pleasure (female masturbation is not shameful). You have to be able to communicate with your partner</b> | Pleasure, masturbation: pleasure in couple, female masturbation + Romantic relationships: communication | Scene 1: Aimee and Otis are in high school for a sex therapy session. She tells him about her last intercourse with Steve: she offered him "daring" sexual practices that he refused. He asked her what she really want and what would make her happy, but she was unable to answer. Otis tells her that all she has to do is think about what she does when she masturbates, but she seems shocked and tells him she never masturbates. He tells her that it would allow her to get to know herself better so she could guide her boyfriend, and that there is no shame in masturbation even if female masturbation is still a taboo.<br>Scene 2: Aimee is on her bed trying to masturbate. She seems to take it as a chore at first, but then she finds what gives her pleasure and masturbates all over her room.<br>Scene 3: In the hallway of the high school, Aimee, with her loose hair and a big smile, doesn't walk straight and goes to thank Otis for his advice.<br>Scene 4: Steve and Aimee on Aimee's bed are kissing and getting ready to have sex. Aimee tells Steve exactly what she wants him to do. |

|               |   |   |                       |                                                                                                                                                                                                                                                                                                                                 |                                                                             |                                                                                                                                                                                                                                                                                                                                                                                                                                                                                                                                                                                                                                                                                                                                                                                 |
|---------------|---|---|-----------------------|---------------------------------------------------------------------------------------------------------------------------------------------------------------------------------------------------------------------------------------------------------------------------------------------------------------------------------|-----------------------------------------------------------------------------|---------------------------------------------------------------------------------------------------------------------------------------------------------------------------------------------------------------------------------------------------------------------------------------------------------------------------------------------------------------------------------------------------------------------------------------------------------------------------------------------------------------------------------------------------------------------------------------------------------------------------------------------------------------------------------------------------------------------------------------------------------------------------------|
| Sex Education | 1 | 7 | 2:45 / 39:20          | <b>Consent information: a "no" means "no". Love can be unrequited and it's painful... but you can't force people's interest</b>                                                                                                                                                                                                 | Sexual violence and harassment: consent                                     | Liam is in love with a girl. He asked her to go out with him, but she politely declined, explaining that she wasn't interested. He continues to show her interest and despite all his grand romantic gestures, she is still not interested. He doesn't understand why. The girl seems frightened. He discusses it with Otis, who explains the consent and says, "Do you understand, Liam? No, it's no."                                                                                                                                                                                                                                                                                                                                                                         |
| Sex Education | 1 | 7 | 20:30                 | <b>Feeling oneself makes it possible to take responsibility for oneself and to strive for well-being, even if this does not necessarily correspond to the normality imposed by society</b>                                                                                                                                      | Self-acceptance / self-esteem                                               | Eric came with his family to the church. Since his aggression in the street (he was walking around in make-up, in women's clothing), he no longer dares to be himself and hides behind classic men's clothing. The priest makes a speech about love and says that love begins by loving oneself, and that if you don't love yourself you can't really love others. After that, Eric feels better and goes to the high school dance wearing make-up, jewelry and a very colorful outfit.                                                                                                                                                                                                                                                                                         |
| Sex Education | 1 | 8 | 14:30 / 25:55         | <b>Vaginism can be an automatic reaction of the body due to the fear of vaginal penetration. The body and the psyche are not disconnected, which can have an impact on the course of sexual intercourse and influence the functioning of the body (beginning of explanation of vaginismus as a psychophysiological process)</b> | Sexual disorders: vaginism                                                  | During a sex therapy session, Lily explains that she tried to have sex but her vagina seemed to close up and she couldn't even put a finger in it. She doesn't understand because she really wanted to and has been waiting a long time for this moment. Otis tells her about vaginismus and explains what it is.                                                                                                                                                                                                                                                                                                                                                                                                                                                               |
| Sex Education | 1 | 8 | 25:55                 | <b>Virginity is not a social or sexual problem and you have to be able to release the pressure you put on yourself to lose that virginity</b>                                                                                                                                                                                   | Other: virginity, first intercourse + Self-acceptance                       | Otis doesn't understand why Lily is in such a hurry to lose her virginity. She tells him that she doesn't want to feel like she's behind the others and that she's afraid to end up alone. He reassures her and explains that it's not a race.                                                                                                                                                                                                                                                                                                                                                                                                                                                                                                                                  |
| Sex Education | 2 | 1 | 03:28                 | <b>There is no shame in masturbating (healthy and normal), but if it is done in public, it is an offence</b>                                                                                                                                                                                                                    | Pleasure: male masturbation                                                 | Otis masturbated in the car in the supermarket parking lot and his mother (Jean) surprised him. Later, she told him that it is healthy and normal to masturbate, but that he should not do it in public because it is a crime.                                                                                                                                                                                                                                                                                                                                                                                                                                                                                                                                                  |
| Sex Education | 2 | 1 | 07:50 / 16:30 / 26:30 | <b>The Chlamydia epidemic is not transmitted through the air but through the exchange of sexual fluids. An infected sexual fluid can transmit the disease to the eye. Chlamydia can be treated with antibiotics (+staging of defensive behavior in the face of slut-shaming insults of sexual practices)</b>                    | STI: chlamydia, transmission + Sexual violence and harassment: slut-shaming | Scene 1: There is an outbreak of Chlamydia in the high school and students are running around screaming, some of them with surgical masks on their faces. Otis tells the student selling the masks that Chlamydia is not transmitted through air but through sexual contact with a carrier. Students come to him for advice and Otis gives information on the transmission of the STI.<br>Scene 2: Fiona is fought and insulted by her two friends who accuse her of having transmitted chlamydia to her, claiming that she is having sex with several boys. Otis defends her and asks the girls to stop slut-shaming.<br>Scene 3: Parents' meeting to discuss the chlamydia epidemic, the principal speaks up and says that the infected students must take antibiotics. Faced |

|               |   |   |                                    |                                                                                                                                   |                                                                          |                                                                                                                                                                                                                                                                                                                                                                                                                                                                                                                                                                                                                                                                                                                                                                                                                                                                                                               |
|---------------|---|---|------------------------------------|-----------------------------------------------------------------------------------------------------------------------------------|--------------------------------------------------------------------------|---------------------------------------------------------------------------------------------------------------------------------------------------------------------------------------------------------------------------------------------------------------------------------------------------------------------------------------------------------------------------------------------------------------------------------------------------------------------------------------------------------------------------------------------------------------------------------------------------------------------------------------------------------------------------------------------------------------------------------------------------------------------------------------------------------------------------------------------------------------------------------------------------------------|
|               |   |   |                                    |                                                                                                                                   |                                                                          | with the parents' ignorance and anxiety, Jean (sexologist) speaks and explains the transmission of chlamydia.                                                                                                                                                                                                                                                                                                                                                                                                                                                                                                                                                                                                                                                                                                                                                                                                 |
| Sex Education | 2 | 1 | 19:25                              | <b>Explanation of favorable behavior (condom use and testing) to protect against a sexually transmitted infection (Chlamydia)</b> | STI protection                                                           | Otis and Eric approached Jackson in high school because he seems to have transmitted chlamydia to 2 girls. Jackson defends himself by saying that he protects himself every time and that he got tested. He shows his negative results.                                                                                                                                                                                                                                                                                                                                                                                                                                                                                                                                                                                                                                                                       |
| Sex Education | 2 | 1 | 39:55                              | <b>There's no shame in having a sexually transmitted infection, but it's important to be honest and tell your partners</b>        | STI                                                                      | Owen confesses to being the one who passed on chlamydia to two girls in high school. Otis asks why he didn't say anything before and Owen says he was ashamed. Otis explains that there is nothing to be ashamed of, that you can't control your body, but you have to be honest with your partners and tell them.                                                                                                                                                                                                                                                                                                                                                                                                                                                                                                                                                                                            |
| Sex Education | 2 | 2 | 21:41 / 37:50 / 43:40 / 44 / 44:30 | <b>Listening to your partner and understanding each other's functioning allows you to better approach sexual intercourse</b>      | Pleasure + Romantic relationships                                        | 1st scene: Ola and Lily are talking and Ola admits that she doesn't dare tell Otis that she didn't like it when he fingered her. Lily repeats it to Otis. A teacher asks Otis for advice because he doesn't understand his partner. Scene 2: Otis asks for advice from a classmate at school who asks him to show what he has done with an orange. She then tells him that every orange is different, that there is no magic technique that works for everyone, and that he needs to talk about it with his girlfriend to find out what to do. Scene 3: Otis is riding his bike outside the school, catches up with the teacher about his problem and tells him to listen to his partner. Scene 4: Otis rings Ola's doorbell, tells her he knows she didn't like it the first time but asks her to show him what to do. Scene 5: The teacher rings his partner's doorbell and asks him to explain his wishes. |
| Sex Education | 2 | 2 | 40:00                              | <b>Advice to use a water-based lubricant, because oil-based lubricants deteriorate the condom</b>                                 | STI protection                                                           | During the sexuality education session, Jean (sexologist) is at the back of the room and intervenes when the teacher does not know how to answer questions. She explains which lubricant to use when having sex with a condom.                                                                                                                                                                                                                                                                                                                                                                                                                                                                                                                                                                                                                                                                                |
| Sex Education | 2 | 2 | 40:00                              | <b>Anyone can refuse sex if their partner does not wish to use a condom</b>                                                       | Contraception + STI protection + Sexual violence and harassment: consent | During the sexuality education session, Jean (sexologist) is at the back of the room and intervenes when the teacher does not know how to answer questions. She explains that one can always say no to sex, and that this also applies in the event that one's partner refuses to use a condom.                                                                                                                                                                                                                                                                                                                                                                                                                                                                                                                                                                                                               |



|               |   |   |                                                 |                                                                                                                                                                                                                      |                                                         |                                                                                                                                                                                                                                                                                                                                                                                                                                                                                                                                                                                                                                                                                                                                                                                                                                                                                                                                                                                                                                                                                        |
|---------------|---|---|-------------------------------------------------|----------------------------------------------------------------------------------------------------------------------------------------------------------------------------------------------------------------------|---------------------------------------------------------|----------------------------------------------------------------------------------------------------------------------------------------------------------------------------------------------------------------------------------------------------------------------------------------------------------------------------------------------------------------------------------------------------------------------------------------------------------------------------------------------------------------------------------------------------------------------------------------------------------------------------------------------------------------------------------------------------------------------------------------------------------------------------------------------------------------------------------------------------------------------------------------------------------------------------------------------------------------------------------------------------------------------------------------------------------------------------------------|
| Sex Education | 2 | 3 | 03:23<br>/<br>10:40<br>/<br>15:40<br>/<br>24:20 | <b>Friction and non-consensual ejaculation received from another person and not consented in public transports is a sexual assault and a complaint must be filed</b>                                                 | Sexual violence and harassment: sexual assault          | <p>1st Scene: Aimee is on the bus, standing. She unintentionally pushes the man behind her and apologizes with a smile. She then realizes that he is masturbating on her and she shouts but nobody reacts. As she gets off the bus she notices semen on her jeans.</p> <p>Scene 2: In high school, Aimee and Maeve are talking. Aimee shows the stain left by the attacker's semen on her jeans. She seems detached but Maeve insists that they go to the police station to file a complaint.</p> <p>Scenes 3 and 4: Aimee and Maeve are at the police station and file a complaint. At first, Aimee doesn't feel legitimate and thinks she is wasting the police officers' time because she doesn't think she has been sexually assaulted. The police officers and Maeve reassure her and explain to her the value of filing a complaint.</p>                                                                                                                                                                                                                                         |
| Sex Education | 2 | 3 | 01:30<br>/<br>21:00<br>/<br>36:30               | <b>When you are ashamed of your face during an orgasm, there are ways to play it down and to help take responsibility for the whole sexual experience. It is important to explain to your partner your feelings.</b> | Self-acceptance + Romantic relationships: communication | <p>1st scene: Olivia and Malek are sleeping together, at orgasm she grabs a pillow and puts it over his face. Malek goes to Jean (sexologist) and talks to him about the problem, she suggests that it may be related to a fantasy and Malek goes to Olivia to tell her to solve her fantasy problem because it makes him uncomfortable.</p> <p>Scene 2: Otis is leaving school on his bike when Olivia appears in front of him and explains that it's not a fantasy but just a way to prevent him from seeing her face because she thinks she's ugly when she comes. Otis reassures her and explains that it's not about looking good but about feeling good with her partner, that it's about trust and that she should talk to him about it to reassure her. He gives her advice</p> <p>3rd scene: Olivia and Malek are on the bed in their underwear, tape on their faces to distort them. They seem to have talked about Olivia's blockage. The tape allows them to see themselves disfigured and to realize that even like that, they love each other and desire each other.</p> |
| Sex Education | 2 | 4 | 00:00<br>/<br>06:50<br>/<br>28:00               | <b>Staging of favorable behavior with a request for consent just before sexual intercourse</b>                                                                                                                       | Sexual violence and harassment: consent                 | <p>1st scene: Otis and Ola are on Otis' bed, playing a video game and kissing. Ola asks Otis if he wants to go further</p> <p>2nd scene: Eric and Otis meet up at the high school and Otis tells him that he is nervous about doing his first time with Ola. Eric tells him that he doesn't have to do it if he is not ready.</p> <p>3rd scene: Ola and Otis kiss on the bed, they start to undress but Otis gets angry because he can't undo Ola's bra. Ola asks him if all is well and tells him that they can stop if he wants to.</p>                                                                                                                                                                                                                                                                                                                                                                                                                                                                                                                                              |

|               |   |   |                               |                                                                                                                                         |                                       |                                                                                                                                                                                                                                                                                                                                                                                                                                                                                                                                                                                 |
|---------------|---|---|-------------------------------|-----------------------------------------------------------------------------------------------------------------------------------------|---------------------------------------|---------------------------------------------------------------------------------------------------------------------------------------------------------------------------------------------------------------------------------------------------------------------------------------------------------------------------------------------------------------------------------------------------------------------------------------------------------------------------------------------------------------------------------------------------------------------------------|
| Sex Education | 2 | 4 | 00:00 / 11:45 / 16:00 / 21:00 | Staging of future sexual intercourse with explicit provision for condom use                                                             | Contraception + STI protection        | Scene 1: Otis and Ola are on Otis's bed, getting ready to have sex, and Ola asks if Otis has a condom.<br>Scene 2: Otis and Ola are in high school. Otis tells Ola that he forgot the condoms but that he can go home and get some. Ola says that she will take care of it.<br>Scene 3: Ola buys a box of condoms.<br>4th scene: Otis receives an SMS from Ola, displayed on the screen it reads "I've got the condoms, when are you coming over?". Otis answers "Be there ASAP!", the message is displayed for 6 seconds.                                                      |
| Sex Education | 2 | 4 | 45:50                         | Asexuality exists it is about not having sexual attractions (in all practices), but it does not mean the absence of amorous attractions | Sexual orientation: asexuality        | Jean, sexologist, in his sexuality education office in the high school. A student enters and expresses her concern because she does not want to have sex, with anyone, ever. She is afraid of being "broken" and still wants to fall in love. Jean explains to her what asexuality is and reassures her that love and sex are two different things and that she can have one without the other.                                                                                                                                                                                 |
| Sex Education | 2 | 5 | 15:10                         | The notion of pleasure does not diminish with age or the absence of intercourse                                                         | Pleasure                              | Jean teaches a class on female pleasure to a few women, including Maureen. Jean shows a model of the female anatomy of the clitoris and talks about pleasure. Maureen asks her if after a long period without sex she will still be able to feel something. Jean reassures her that the pleasure does not diminish with age or lack of contact.                                                                                                                                                                                                                                 |
| Sex Education | 2 | 5 | 23:00                         | Staging explaining what "pansexuality" is: being attracted to a person regardless of gender or sex                                      | Sexual orientation: pansexuality      | Ola and Adam work together in a grocery store, they are alone. Ola takes an online test to find out her sexual orientation and the answer is "pansexuality". She reads the definition and seems to recognize herself in it.                                                                                                                                                                                                                                                                                                                                                     |
| Sex Education | 2 | 6 | 11:30 / 12:55                 | Visual (diagram) and verbal explanation of how to perform an anal enema                                                                 | Other: enema before anal penetration  | 1st scene: in a classroom, Rahim is at the blackboard, he has drawn a figure explaining the steps of the anal enema and explains them to Otis and Eric sitting in front of him.<br>2nd scene: following the 1st scene, a teacher enters the room and asks them what they are doing and then kicks them out. When the boys leave the room, the teacher takes a picture of the board with the figure.                                                                                                                                                                             |
| Sex Education | 2 | 6 | 38:20 / 43:00                 | Counselling and staging of communication with your partner in order to have a good sexual intercourse                                   | Romantic relationships: communication | 1st scene: At a party, Anwar comes to talk to Rahim and asks him to explain how to do an anal enema because he doesn't know how to do it and he doesn't want to tell his boyfriend. Rahim tells him that if he doesn't feel ready to talk to his boyfriend, he is not ready to have sex with him. He advises him to go and talk to him<br>2nd scene: same evening, Anwar and his boyfriend Nick are talking and Anwar confesses to him that he doesn't know how to douche and that he is a virgin. His boyfriend reassures him and tells him that he is going to explain to him |

|               |   |   |                               |                                                                                                                                                                                                                                            |                                                                    |                                                                                                                                                                                                                                                                                                                                                                                                                                                                                                                                                                                                                                                                                                                                                                                                                                                                                                                                              |
|---------------|---|---|-------------------------------|--------------------------------------------------------------------------------------------------------------------------------------------------------------------------------------------------------------------------------------------|--------------------------------------------------------------------|----------------------------------------------------------------------------------------------------------------------------------------------------------------------------------------------------------------------------------------------------------------------------------------------------------------------------------------------------------------------------------------------------------------------------------------------------------------------------------------------------------------------------------------------------------------------------------------------------------------------------------------------------------------------------------------------------------------------------------------------------------------------------------------------------------------------------------------------------------------------------------------------------------------------------------------------|
| Sex Education | 2 | 6 | 13:40 / 43:00                 | <b>Consent: it is not mandatory to have sexual intercourse within the couple. Both partners have to be ready and it is possible to refuse sex in a couple</b>                                                                              | Sexual violence and harassment: consent                            | Scene 1: Rahim and Eric are kissing, and Eric asks him why he has never tried to have sex with him when he seems to have experience. Rahim answers that he doesn't want to pressure him and that he is waiting for Eric to feel ready.<br>Scene 2: Anwar is standing alone in a corner, his boyfriend comes up to him and asks him to leave. Anwar refuses and his boyfriend tells him that he hopes he hasn't pressured him into having sex, and that they don't have to do anything until Anwar is ready.                                                                                                                                                                                                                                                                                                                                                                                                                                  |
| Sex Education | 2 | 7 | 09:16 / 12:26 / 13:25 / 27:13 | <b>In the case of sexual intercourse between a girl and a boy with doubts about the use of contraception, there is the morning-after pill, which is delivered anonymously. There is no shame in using it and it concerns both partners</b> | Contraception: morning after pill + Planned or unplanned pregnancy | Scene 1: Ruby and Otis are talking after having sex while drunk. They can't remember if they used a condom.<br>Scene 2: Otis and Ruby are in front of the pharmacy and Ruby asks Otis to go buy the morning-after pill for her.<br>Scene 3: Otis is in the pharmacy and asks for the morning-after pill. The pharmacist tells him that she can't give it to him because he's a man. Otis comes out of the pharmacy to get Ruby and reassures her that this happens to everyone and that there is nothing humiliating about it. He promises to help her if she's pregnant and chooses to keep the baby. Ruby is at the pharmacy cash register with Otis who is a few meters away. The pharmacist asks Ruby questions about her menstrual cycle and history and then sells her the morning-after pill. Otis pays.<br>Scene 4: Otis and Ruby are sitting in the forest, each with a can of Coke, Ruby reads the pill instructions and takes it. |
| Sex Education | 2 | 7 | 31:11                         | <b>Staging of girl-to-girl social support to help a victim of sexual violence cope with her trauma (others can help cope) + testimonies of other girls to accompany her + stated number of women experiencing sexual assault</b>           | Sexual violence and harassment: sexual assault                     | Aimee, Maeve, Ola, Vivian, Olivia and Lily, in collective punishment, must find a subject that binds them as women. Finding no common ground, Ola and Maeve argue about Otis. Aimee bursts into tears and tells them to stop arguing over a boy and then explains her discomfort. She explains that she doesn't dare to take the bus anymore because of her sexual assault. The girls empathize with her, support her and take turns telling about the abuse they have suffered. One girl said that two-thirds of the girls experience unwanted sexual contact in public spaces before the age of 21.                                                                                                                                                                                                                                                                                                                                        |
| Sex Education | 2 | 8 | 00:00                         | <b>To treat vaginismus, there are specific kit available. It is also possible to have non-vaginal sex during vaginismus</b>                                                                                                                | Sexual disorders                                                   | Lily and Ola kiss each other on the bed, Ola slips her hand into Lily's panties and tries to finger her, Lily is in pain and Ola asks her what's wrong. Lily takes out a box, in which there are several dilators to treat the vaginismus. She explains her situation to Ola. They end up masturbating side by side.                                                                                                                                                                                                                                                                                                                                                                                                                                                                                                                                                                                                                         |
| The Society   | 1 | 2 | 29:43                         | <b>The pill prevents unwanted pregnancies and it is recommended not to smoke when taking it</b>                                                                                                                                            | Contraception: pill                                                | Gordie goes through Cassandra's medical records and wonders what a certain medication is for. She explains to him that it is the pill, and that it is best to be careful. He replies that she should avoid smoking while on the pill.                                                                                                                                                                                                                                                                                                                                                                                                                                                                                                                                                                                                                                                                                                        |
| The Society   | 1 | 2 | 42:30                         | <b>Kissing someone requires consent (kissing cannot be forced)</b>                                                                                                                                                                         | Sexual violence and harassment: consent                            | Will and Kelly count the products in the supermarket. He leans over to Kelly to give her a kiss, but she backs away and tells him to ask first.                                                                                                                                                                                                                                                                                                                                                                                                                                                                                                                                                                                                                                                                                                                                                                                              |

|                    |   |   |       |                                                                                                                                        |                                |                                                                                                                                                                                                                                                                                                                                                                                   |
|--------------------|---|---|-------|----------------------------------------------------------------------------------------------------------------------------------------|--------------------------------|-----------------------------------------------------------------------------------------------------------------------------------------------------------------------------------------------------------------------------------------------------------------------------------------------------------------------------------------------------------------------------------|
| <b>The Society</b> | 1 | 3 | 32:10 | <b>It is important for women to urinate after sex to avoid cystitis and drinking cranberry juice can help</b>                          | Other: cystitis                | Cassandra is putting makeup on in the bathroom when her sister, Allie, comes in in a rush to pee and complains of burning when urinating. Her sister tells her it's probably a urinary tract infection and that she has to urinate after sex. She advises her to drink cranberry juice.                                                                                           |
| <b>The Society</b> | 1 | 3 | 53:55 | <b>Staging the use of the condom</b>                                                                                                   | STI protection + Contraception | Campbel and Elle are in a room and kissing. They undress and get into bed. He opens a drawer full of condoms (the camera zooms in on it) and pulls one out. She takes it from him and puts it on him.                                                                                                                                                                             |
| <b>The Society</b> | 1 | 8 | 28:16 | <b>Staging of a gay boy who had sex with a girl who then became pregnant: emphasizing that sexuality is not fixed and can be fluid</b> | Sexual orientation             | At the hospital, Sam is at the bedside of Becca who is pregnant. 2 girls come to see her and ask if Sam is the father, he says yes. Gwen reacts with a surprised and skeptical "huh" then congratulates them and says goodbye. The 2 girls leave and in front of her friend's disapproving look, Gwen says "what? You know he's gay". Her friend replies that sexuality is fluid. |
